# Supplementary material
Source: PubMed Central journal article supplement (PMC6279252)
Supplement: NIHMS976884-supplement-2.pdf [file NIHMS976884-supplement-2.pdf]

## Reporting Summary

Nature Research wishes to improve the reproducibility of the work that we publish. This form provides structure for consistency and transparency in reporting. For further information on Nature Research policies, see [Authors & Referees](#) and the [Editorial Policy Checklist](#).

### Statistical parameters

When statistical analyses are reported, confirm that the following items are present in the relevant location (e.g. figure legend, table legend, main text, or Methods section).

n/a Confirmed

- The exact sample size ( $n$ ) for each experimental group/condition, given as a discrete number and unit of measurement
- An indication of whether measurements were taken from distinct samples or whether the same sample was measured repeatedly
- The statistical test(s) used AND whether they are one- or two-sided  
*Only common tests should be described solely by name; describe more complex techniques in the Methods section.*
- A description of all covariates tested
- A description of any assumptions or corrections, such as tests of normality and adjustment for multiple comparisons
- A full description of the statistics including central tendency (e.g. means) or other basic estimates (e.g. regression coefficient) AND variation (e.g. standard deviation) or associated estimates of uncertainty (e.g. confidence intervals)
- For null hypothesis testing, the test statistic (e.g.  $F$ ,  $t$ ,  $r$ ) with confidence intervals, effect sizes, degrees of freedom and  $P$  value noted  
*Give  $P$  values as exact values whenever suitable.*
- For Bayesian analysis, information on the choice of priors and Markov chain Monte Carlo settings
- For hierarchical and complex designs, identification of the appropriate level for tests and full reporting of outcomes
- Estimates of effect sizes (e.g. Cohen's  $d$ , Pearson's  $r$ ), indicating how they were calculated
- Clearly defined error bars  
*State explicitly what error bars represent (e.g. SD, SE, CI)*

*Our web collection on [statistics for biologists](#) may be useful.*

### Software and code

Policy information about [availability of computer code](#)

Data collection

Andor iQ (Andor Technologies)

Data analysis

FRAP analysis: custom-written Matlab software. Single molecule tracking: custom-written Matlab software. Curve fitting, statistical analysis: GraphPad Prism 6. 3-D analysis: Imaris x64 v. 8.4.1

For manuscripts utilizing custom algorithms or software that are central to the research but not yet described in published literature, software must be made available to editors/reviewers upon request. We strongly encourage code deposition in a community repository (e.g. GitHub). See the Nature Research [guidelines for submitting code & software](#) for further information.

### Data

Policy information about [availability of data](#)

All manuscripts must include a [data availability statement](#). This statement should provide the following information, where applicable:

- Accession codes, unique identifiers, or web links for publicly available datasets
- A list of figures that have associated raw data
- A description of any restrictions on data availability

The following figures have associated raw data that are made available in Suppl Table 1: Fig. 1-4, 6, 7; Supplementary Fig. 2, 4, 5, 6,

## Field-specific reporting

Please select the best fit for your research. If you are not sure, read the appropriate sections before making your selection.

Life sciences  Behavioural & social sciences

For a reference copy of the document with all sections, see [nature.com/authors/policies/ReportingSummary-flat.pdf](https://www.nature.com/authors/policies/ReportingSummary-flat.pdf)

## Life sciences

### Study design

All studies must disclose on these points even when the disclosure is negative.

|                 |                                                                                                                                                                                                                                                                                                                                                                                                                                                                                                                                                        |
|-----------------|--------------------------------------------------------------------------------------------------------------------------------------------------------------------------------------------------------------------------------------------------------------------------------------------------------------------------------------------------------------------------------------------------------------------------------------------------------------------------------------------------------------------------------------------------------|
| Sample size     | For immunofluorescence and FRAP experiments, sample size (cells or spots, respectively) was selected based on commonly adopted standards in the field, resulting in statistically meaningful comparisons.                                                                                                                                                                                                                                                                                                                                              |
| Data exclusions | No data were excluded from the experiments reported.                                                                                                                                                                                                                                                                                                                                                                                                                                                                                                   |
| Replication     | All experiments were carried out under standard and clearly defined conditions, and were replicated successfully by at least one researcher. One experiment (Fig. 3c) showed variable levels of FRAP suppression by GDP loading of RagB. We attribute this variability to varying levels of GDP loading efficiency of RagB. However, this result was independently verified using Rag mutants that are preferentially GDP-loaded, both in vitro and in cells, as well as by performing starvation/refeeding in cells expressing wild-type Rag GTPases. |
| Randomization   | Randomization was applied to single molecule datasets (Fig. 4e, 4h and 6h, procedure illustrated in Supplemental Fig. 5b ) which were randomly divided into 10 subsets, each including 10% of data points, then fitted and averaged to obtain average half-lives                                                                                                                                                                                                                                                                                       |
| Blinding        | for co-localization analysis, the control channel was used to choose and segment the fields/cells analyzed in the experimental channel.                                                                                                                                                                                                                                                                                                                                                                                                                |

### Materials & experimental systems

Policy information about [availability of materials](#)

|                                     |                                                           |
|-------------------------------------|-----------------------------------------------------------|
| n/a                                 | Involvement in the study                                  |
| <input type="checkbox"/>            | <input checked="" type="checkbox"/> Unique materials      |
| <input type="checkbox"/>            | <input checked="" type="checkbox"/> Antibodies            |
| <input type="checkbox"/>            | <input checked="" type="checkbox"/> Eukaryotic cell lines |
| <input checked="" type="checkbox"/> | <input type="checkbox"/> Research animals                 |
| <input checked="" type="checkbox"/> | <input type="checkbox"/> Human research participants      |

#### Unique materials

Obtaining unique materials

#### Antibodies

Antibodies used

Validation

#### Eukaryotic cell lines

Policy information about [cell lines](#)

Cell line source(s)

Authentication

Mycoplasma contamination

Commonly misidentified lines  
(See [ICLAC](#) register)

no cell lines from this register were used

## Method-specific reporting

---

| n/a                                 | Involvement in the study                            |
|-------------------------------------|-----------------------------------------------------|
| <input checked="" type="checkbox"/> | <input type="checkbox"/> ChIP-seq                   |
| <input checked="" type="checkbox"/> | <input type="checkbox"/> Flow cytometry             |
| <input checked="" type="checkbox"/> | <input type="checkbox"/> Magnetic resonance imaging |
